# Supplementary material for: Synthetic Mono-Rhamnolipids Display Direct Antifungal Effects and Trigger an Innate Immune Response in Tomato against Botrytis Cinerea
Source: PubMed Central journal article supplement (PMC7397090; doi:10.3390/molecules25143108), 2020-07-08
Supplement: molecules-25-03108-s001.pdf [file molecules-25-03108-s001.pdf]

**Supplemental data**

| Molecular formula | Synonyms                                                     | Structural formula                                                                   |
|-------------------|--------------------------------------------------------------|--------------------------------------------------------------------------------------|
| Eth-C4            | Butyl $\alpha/\beta$ -L-rhamnopyranoside                     |                                                                                      |
| Eth-C6            | Hexyl $\alpha/\beta$ -L-rhamnopyranoside                     |                                                                                      |
| Eth-C8            | Octyl $\alpha/\beta$ -L-rhamnopyranoside                     |                                                                                      |
| Eth-C10           | Decyl $\alpha/\beta$ -L-rhamnopyranoside                     |                                                                                      |
| Eth-C12           | Dodecyl $\alpha/\beta$ -L-rhamnopyranoside                   |                                                                                      |
| Eth-C14           | Tetradecyl $\alpha/\beta$ -L-rhamnopyranoside                |                                                                                      |
| Eth-C16           | Hexadecyl $\alpha/\beta$ -L-rhamnopyranoside                 |                                                                                      |
| Eth-C18           | Octadecyl $\alpha/\beta$ -L-rhamnopyranoside                 |                                                                                      |
| Est-C12           | Dodecanoyl $\alpha/\beta$ -L-rhamnopyranoside                | 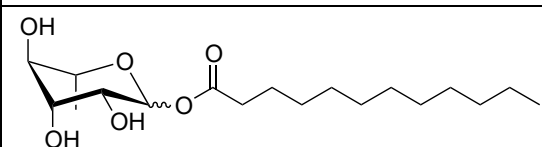 |
| Car-C12           | $\alpha/\beta$ -L-Rhamnopyranosyl <i>N</i> -dodecylcarbamate |  |
| Suc-C12           | Dodecenylsuccinate $\alpha/\beta$ -L-rhamnopyranoside        |  |

**Table S1:** List of Synthetic mono-rhamnolipids used in this study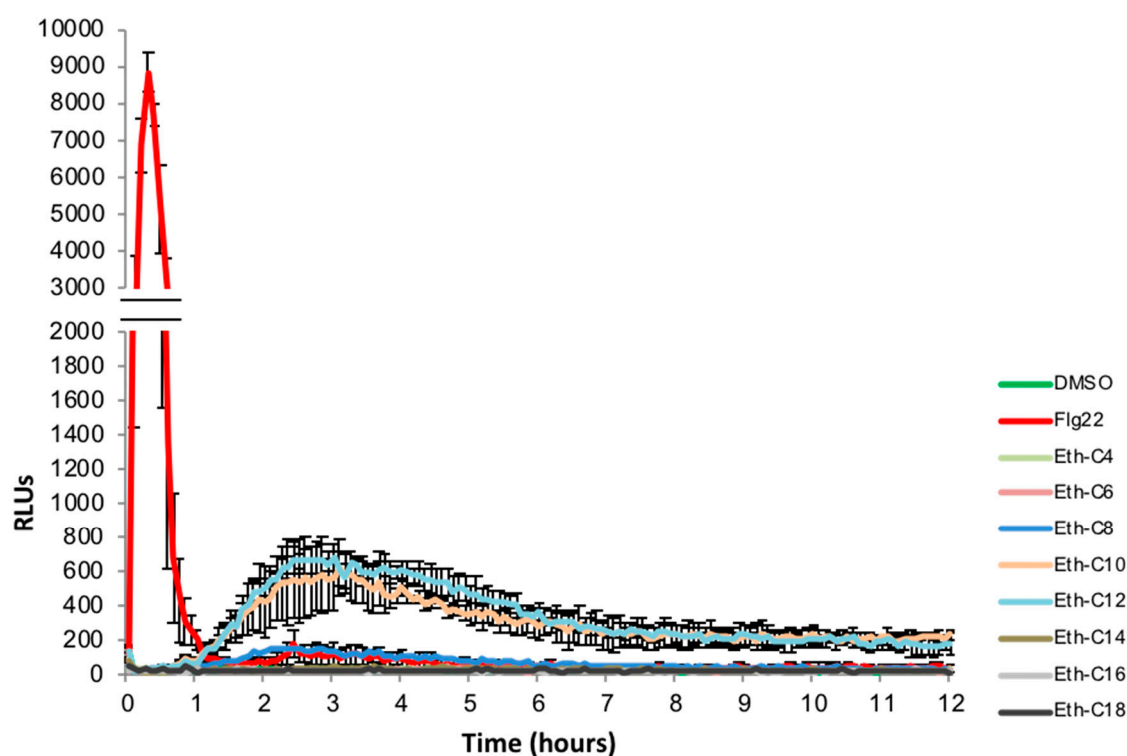

**Figure S1.** Production of ROS after treatment with Eth-smRLs exhibiting different carbon chain lengths; Flagellin (Flg22 peptide at 1  $\mu$ M) and DMSO (0.1%) were used as positive and negative controls, respectively. Reactive oxygen species (ROS) production was measured using the chemiluminescence of luminol and photon counts were expressed as relative luminescence units (RLUs).

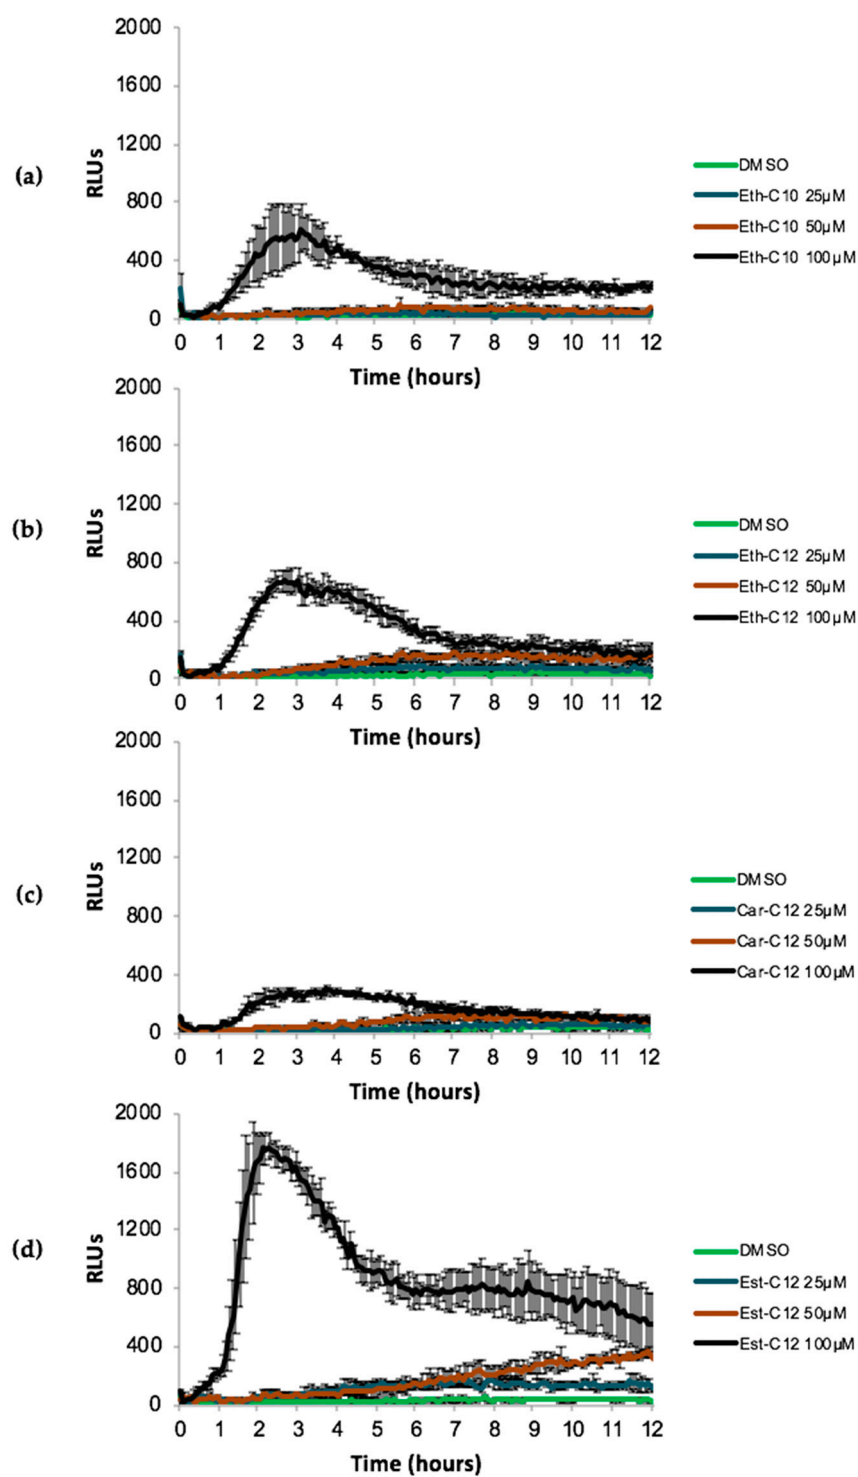

1.

**Figure S2.** smRLs dose–response (25, 50, and 100  $\mu\text{M}$ ) on ROS production in tomato leaf disks. DMSO (0.1%) was used as control. Reactive oxygen species (ROS) production was measured using the chemiluminescence of luminol and photon counts were expressed as relative luminescence units (RLUs).
